# Supplementary material for: Tailoring atomically dispersed Fe-induced oxygen vacancies for highly efficient gas-phase photocatalytic CO2 reduction and NO removal with diminished noxious byproducts
Source: Royal Society of Chemistry journal article supplement (doi:10.1039/d4ta05778c), 2024-01-01
Supplement: d4ta05778c1.pdf [file d4ta05778c1.pdf]

## Supplementary Information

# Tailoring Atomically Dispersed Fe-Induced Oxygen Vacancy for Highly Efficient Gas-Phase Photocatalytic CO<sub>2</sub> Reduction and NO Removal with Diminished Noxious Byproducts

Nguyen Quoc Thang<sup>1,2,3,4,5</sup>, Amr Sabbah<sup>2,6,7,\*</sup>, Chih-Yang Huang<sup>2,8,9</sup>, Nguyen Hoang Phuong<sup>10</sup>,  
Tsai-Yu Lin<sup>2,8,9</sup>, Mahmoud Kamal Hussien<sup>1,2,11</sup>, Heng-Liang Wu<sup>2,6,12</sup>, Chih-I Wu<sup>13</sup>, Nguyet N. T.  
Pham<sup>14</sup>, Pham Van Viet<sup>10</sup>, Chih-Hao Lee<sup>5</sup>, Li-Chyong Chen<sup>2,6,15,\*</sup>, Kuei-Hsien Chen<sup>1,2,\*</sup>

<sup>1</sup> Institute of Atomic and Molecular Sciences, Academia Sinica, Taipei 10617, Taiwan

<sup>2</sup> Center for Condensed Matter Sciences, National Taiwan University, Taipei 10617, Taiwan

<sup>3</sup> Nano Science and Technology Program, Taiwan International Graduate Program, Academia Sinica,  
Taipei 115, Taiwan and National Tsing Hua University, Hsinchu, 300, Taiwan

<sup>4</sup> Institute of Physics, Academia Sinica, Taipei 15201, Taiwan

<sup>5</sup> Department of Engineering and System Science, National Tsing Hua University, Hsinchu, 30013,  
Taiwan

<sup>6</sup> Center of Atomic Initiative for New Materials, National Taiwan University, Taipei, 106, Taiwan

<sup>7</sup> Tabbin Institute for Metallurgical Studies, Tabbin, Helwan 109, Cairo 11421, Egypt

<sup>8</sup> International Graduate Program of Molecular Science and Technology, National Taiwan University  
(NTU-MST), Taipei 10617, Taiwan

<sup>9</sup> Molecular Science and Technology Program, Taiwan International Graduate Program (TIGP),  
Academia Sincia, Taipei 11529, Taiwan

<sup>10</sup> Advanced Materials and Applications Research Group, Ho Chi Minh University of Technology,  
475A Dien Bien Phu Street, Binh Thanh District, Ho Chi Minh City 700000, Vietnam

<sup>11</sup> Department of Chemistry, Faculty of Science, Assiut University, Assiut 71516, Egypt

<sup>12</sup> Department of Chemistry, National Taiwan University, Taipei 10617, Taiwan

<sup>13</sup> Graduate Institute of Photonics and Optoelectronics, National Taiwan University, Taipei 10617,  
Taiwan

<sup>14</sup> Faculty of Chemistry, University of Science, Vietnam National University Ho Chi Minh City, Ho  
Chi Minh 700000, Vietnam.

<sup>15</sup> Department of Physics, National Taiwan University, Taipei 10617, Taiwan

\*Corresponding author: [chenkh@pub.iams.sinica.edu.tw](mailto:chenkh@pub.iams.sinica.edu.tw) (K.-H. Chen)

[chenlc@ntu.edu.tw](mailto:chenlc@ntu.edu.tw) (L.-C. Chen)

[amrsabbah@ntu.edu.tw](mailto:amrsabbah@ntu.edu.tw) (A. Sabbah)

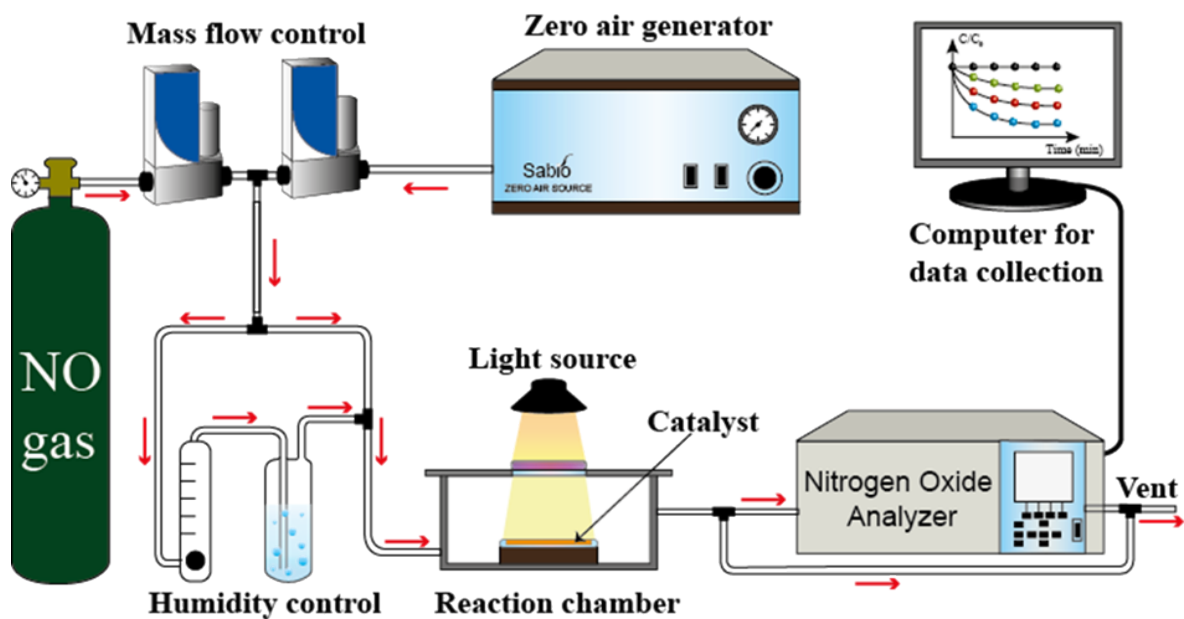

Figure S1. Schematic illustration of photocatalytic NO removal setup.

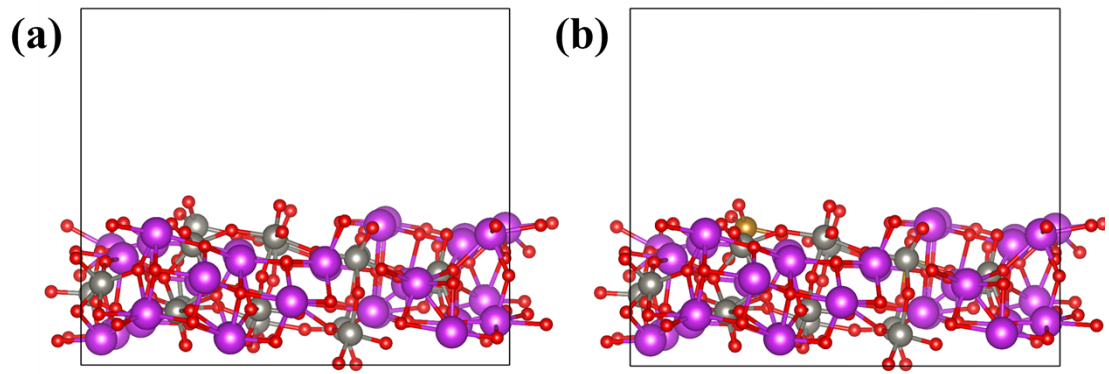

**Figure S2.** The most optimized configuration of **(a)** pristine  $\text{Bi}_2\text{WO}_6$  (131) and **(b)** Fe- $\text{Bi}_2\text{WO}_6$  (131). The grey, pink, red, and deep yellow spheres represent tungsten (W), bismuth (Bi), oxygen (O), and iron (Fe), respectively.

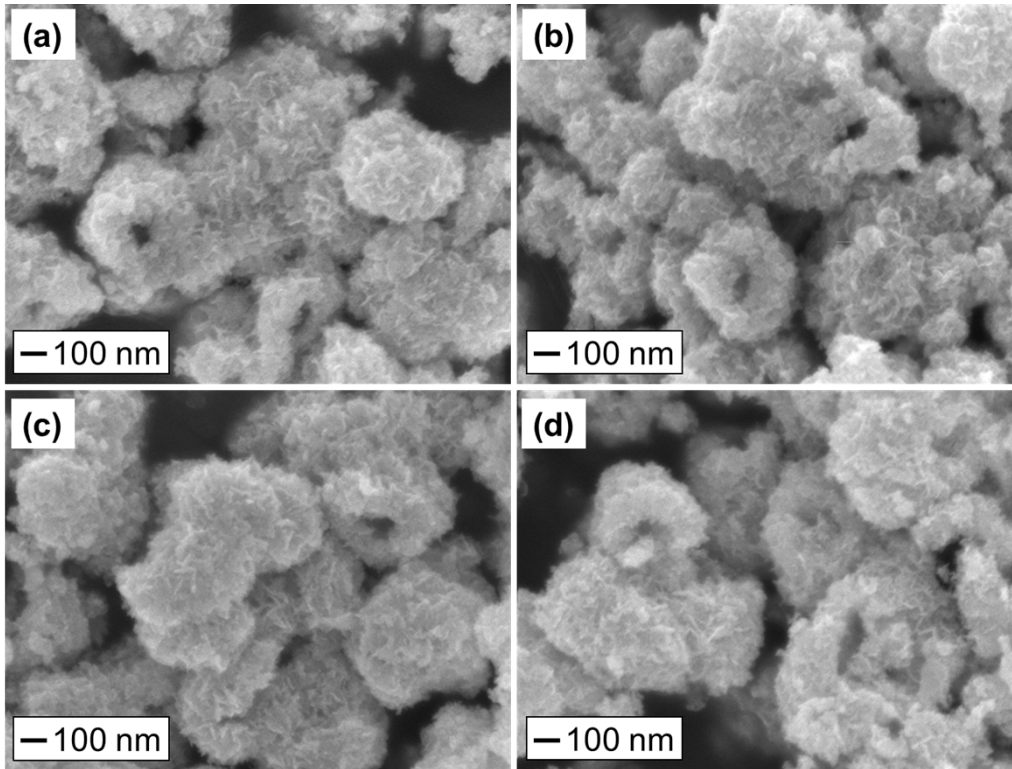

**Figure S3.** SEM images of **(a)** pristine  $\text{Bi}_2\text{WO}_6$ , and **(b-d)**  $x\text{Fe-Bi}_2\text{WO}_6$  where  $x = 1, 1.5, 2$ , respectively.

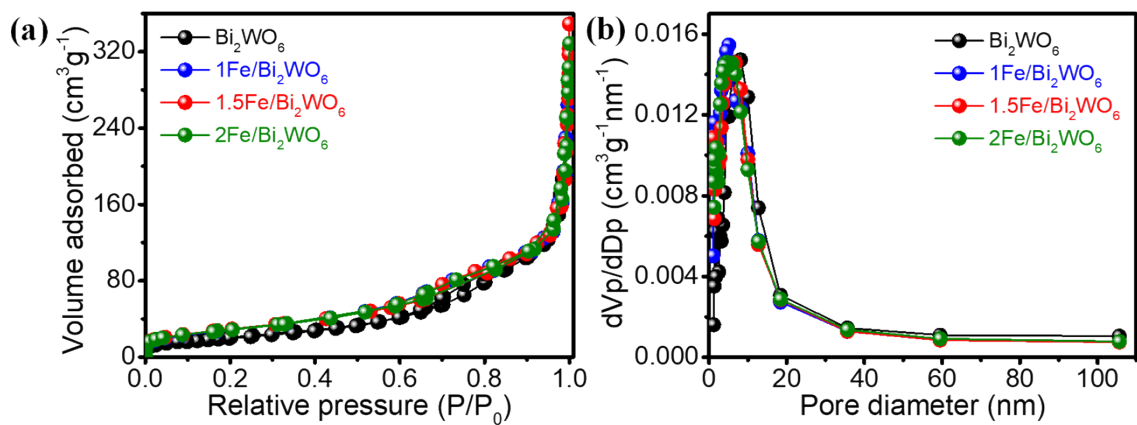

**Figure S4.** (a) Nitrogen adsorption-desorption isotherms, and (b) pore size distribution of Bi<sub>2</sub>WO<sub>6</sub> and xFe-Bi<sub>2</sub>WO<sub>6</sub> (x = 1, 1.5, 2).

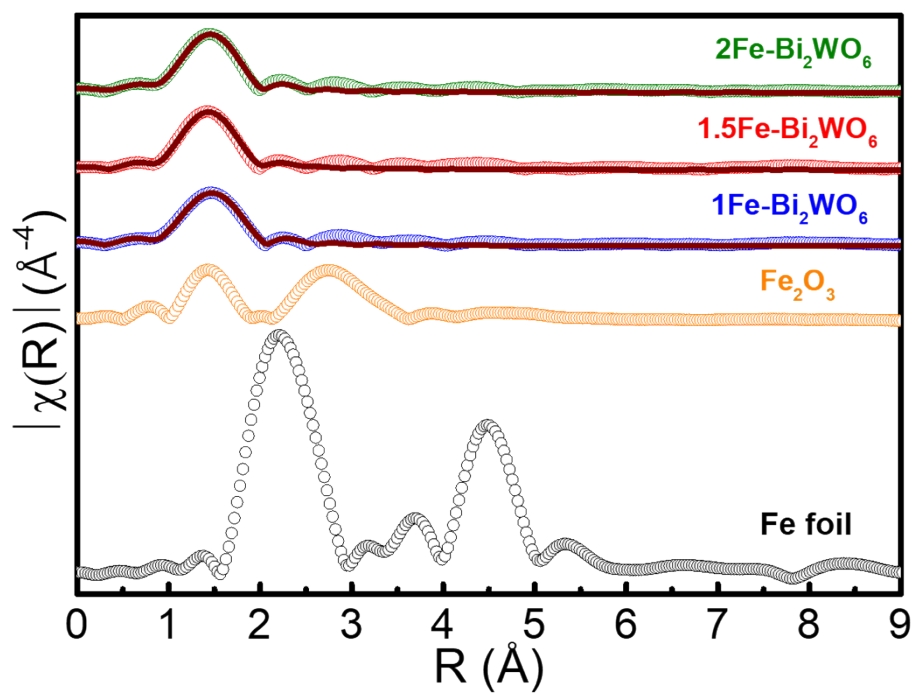

**Figure S5.** Fourier-transform extended X-ray absorption fine structure (FT-EXAFS) fitting curves of  $x\text{Fe-Bi}_2\text{WO}_6$  ( $x = 1, 1.5, 2$ ) and FT-EXAFS curves of Fe foil and  $\text{Fe}_2\text{O}_3$ .

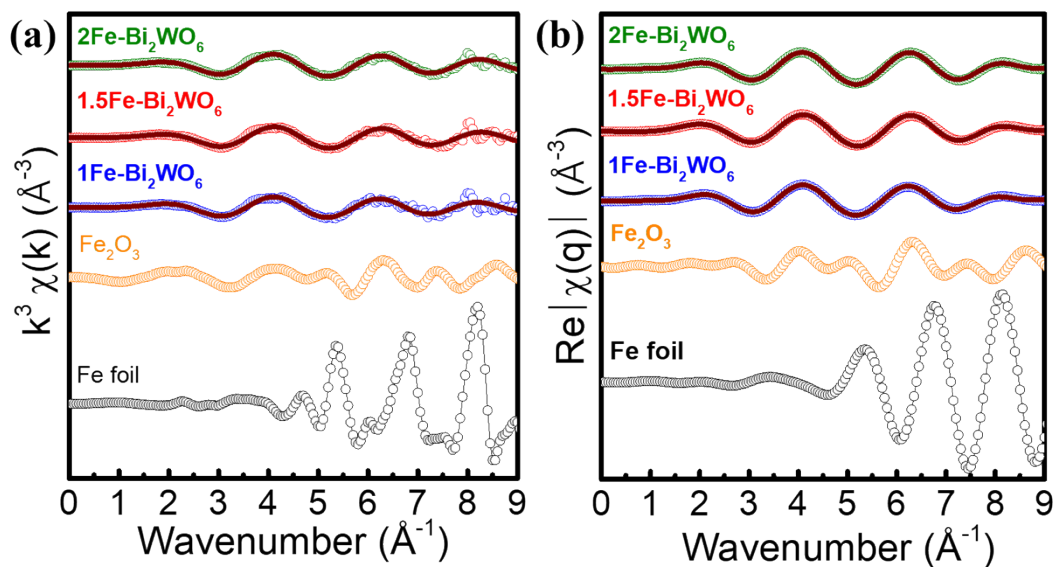

**Figure S6.** Fourier transform of Fe K-edge EXAFS spectra in (a)  $k$ , and (b)  $q$  space for Fe foil,  $\text{Fe}_2\text{O}_3$ , and the corresponding fitting curves for  $x\text{Fe-Bi}_2\text{WO}_6$  ( $x=1, 1.5, 2$ ).

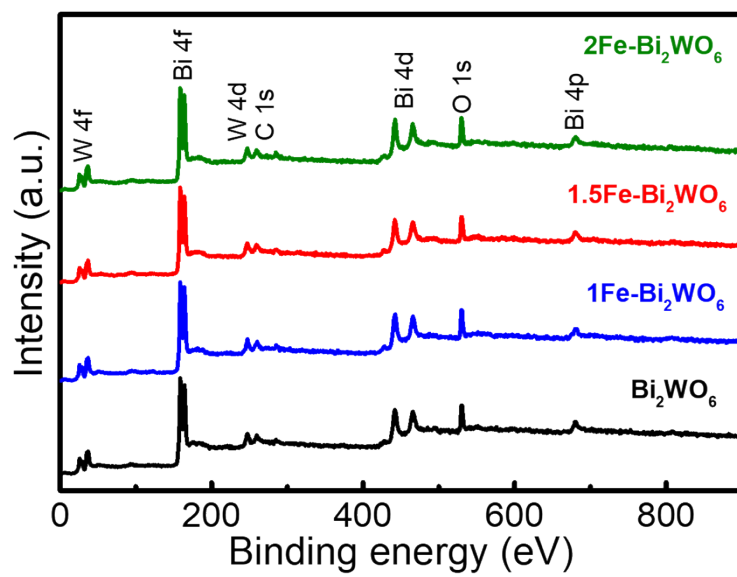

**Figure S7.** XPS survey spectra of  $\text{Bi}_2\text{WO}_6$  and  $x\text{Fe-Bi}_2\text{WO}_6$  ( $x=1, 1.5, 2$ ).



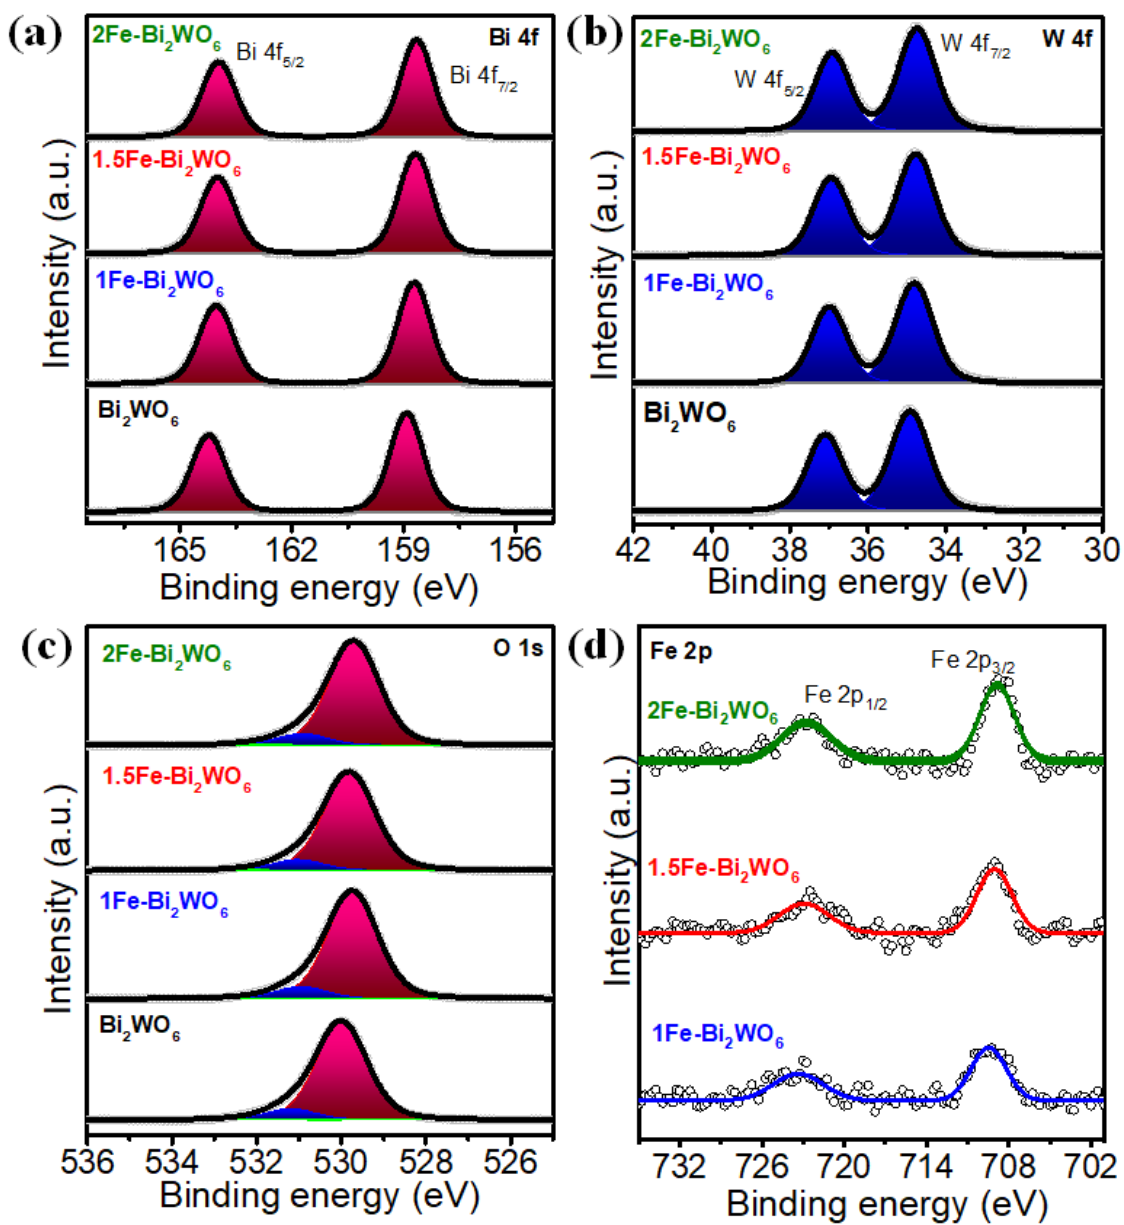

**Figure S8.** High-resolution X-ray photoelectron spectra of  $\text{Bi}_2\text{WO}_6$ , and  $x\text{Fe-Bi}_2\text{WO}_6$  ( $x=1, 1.5, 2$ ).

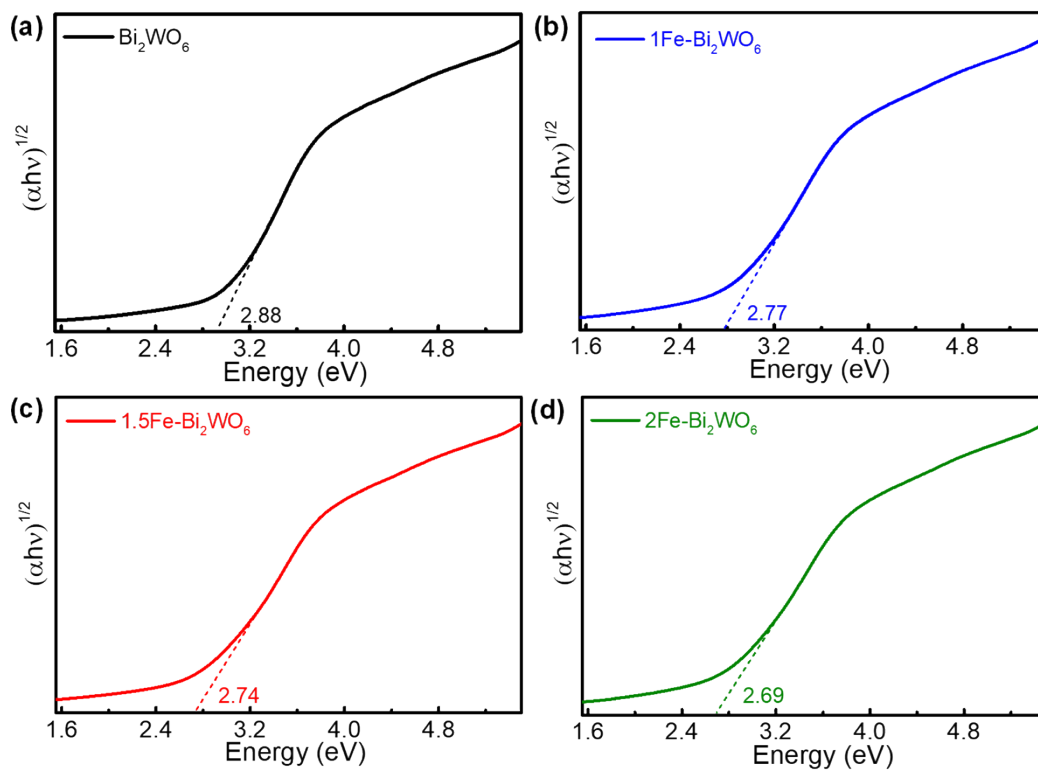

**Figure S9.** Tauc plots for  $\text{Bi}_2\text{WO}_6$  and  $x\text{Fe-Bi}_2\text{WO}_6$  ( $x=1, 1.5, 2$ ).

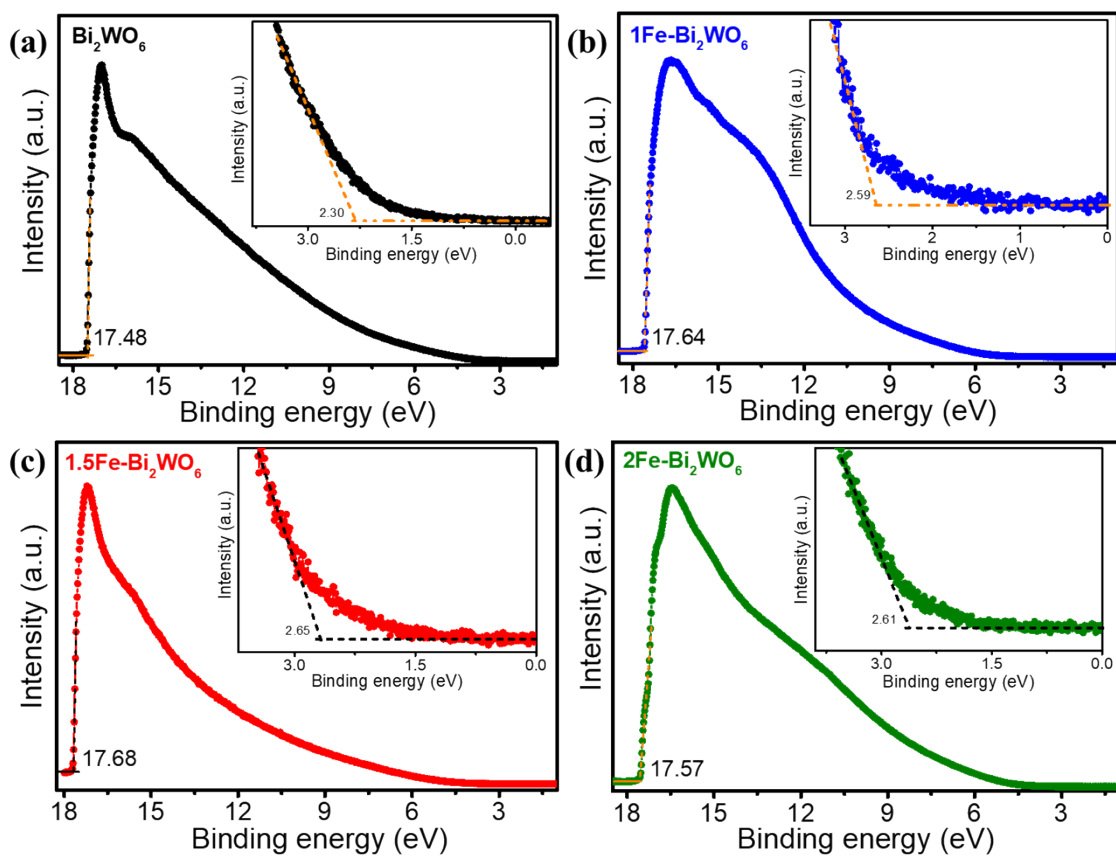

**Figure S10.** UPS spectra of  $\text{Bi}_2\text{WO}_6$  and  $x\text{Fe-Bi}_2\text{WO}_6$  ( $x=1, 1.5, 2$ ).

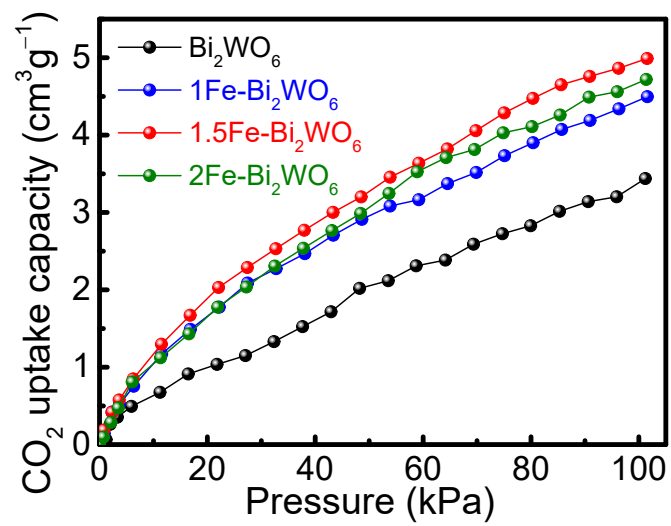

**Figure S11.** CO<sub>2</sub> adsorption curves for Bi<sub>2</sub>WO<sub>6</sub> and xFe-Bi<sub>2</sub>WO<sub>6</sub>.

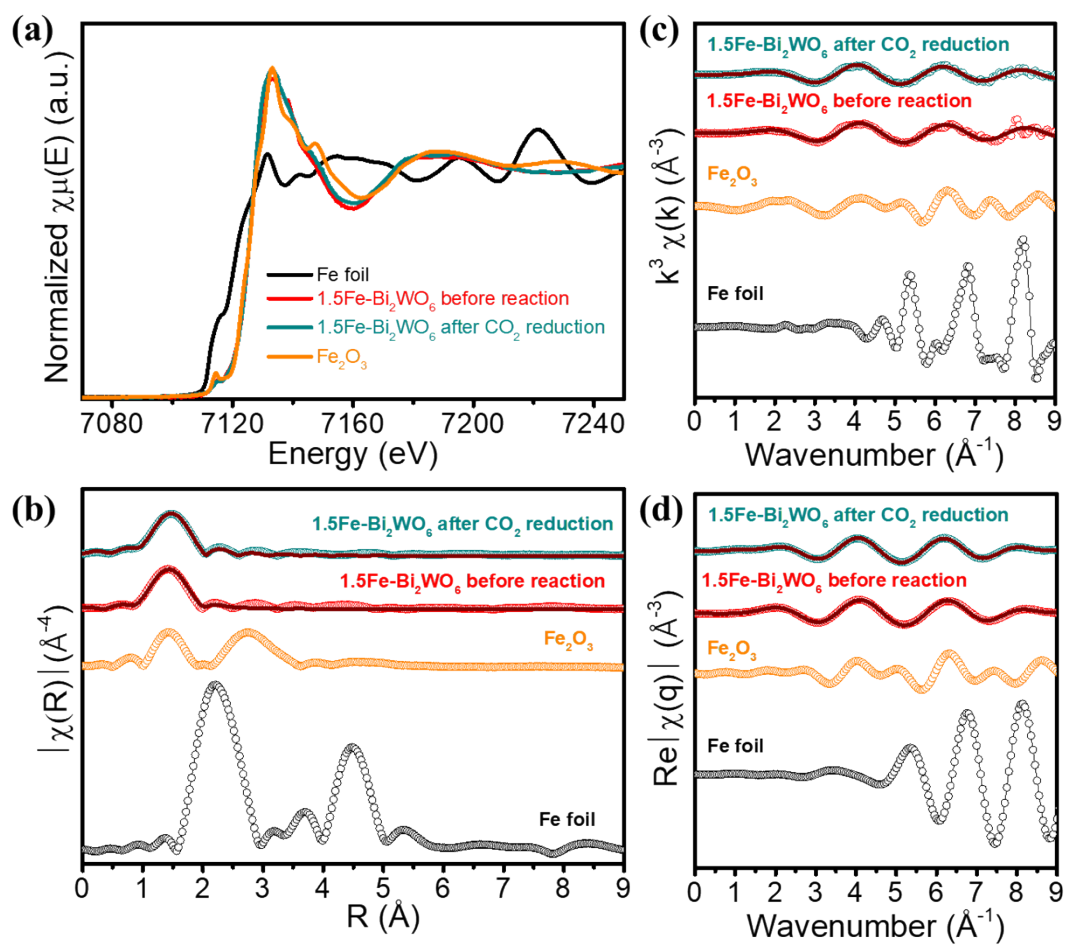

**Figure S12.** (a) Fe K-edge XANES, (b-d) FT-EXAFS spectra and corresponding fitting curves of Fe foil,  $\text{Fe}_2\text{O}_3$ , and  $1.5\text{Fe-Bi}_2\text{WO}_6$  before and after stability test for photocatalytic  $\text{CO}_2$  reduction.

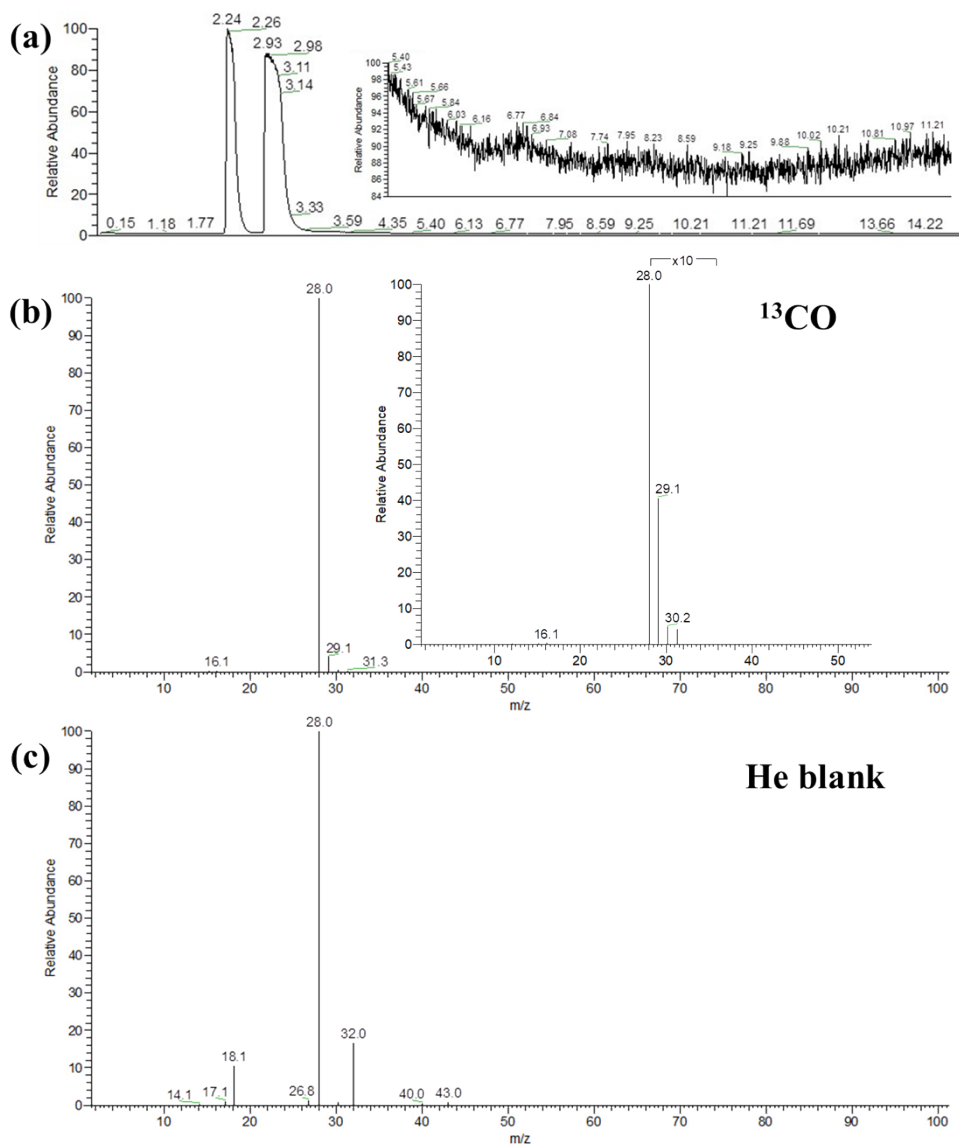

**Figure S13.** Total ion chromatography (a) and mass spectrum of (b)  $^{13}\text{C}$  isotope tracing measurement in  $\text{CO}_2$  photoreduction over  $1.5\text{Fe-Bi}_2\text{WO}_6$  (the inset figures show the zoom region of  $^{13}\text{CO}$  peak) (c) He blank test.

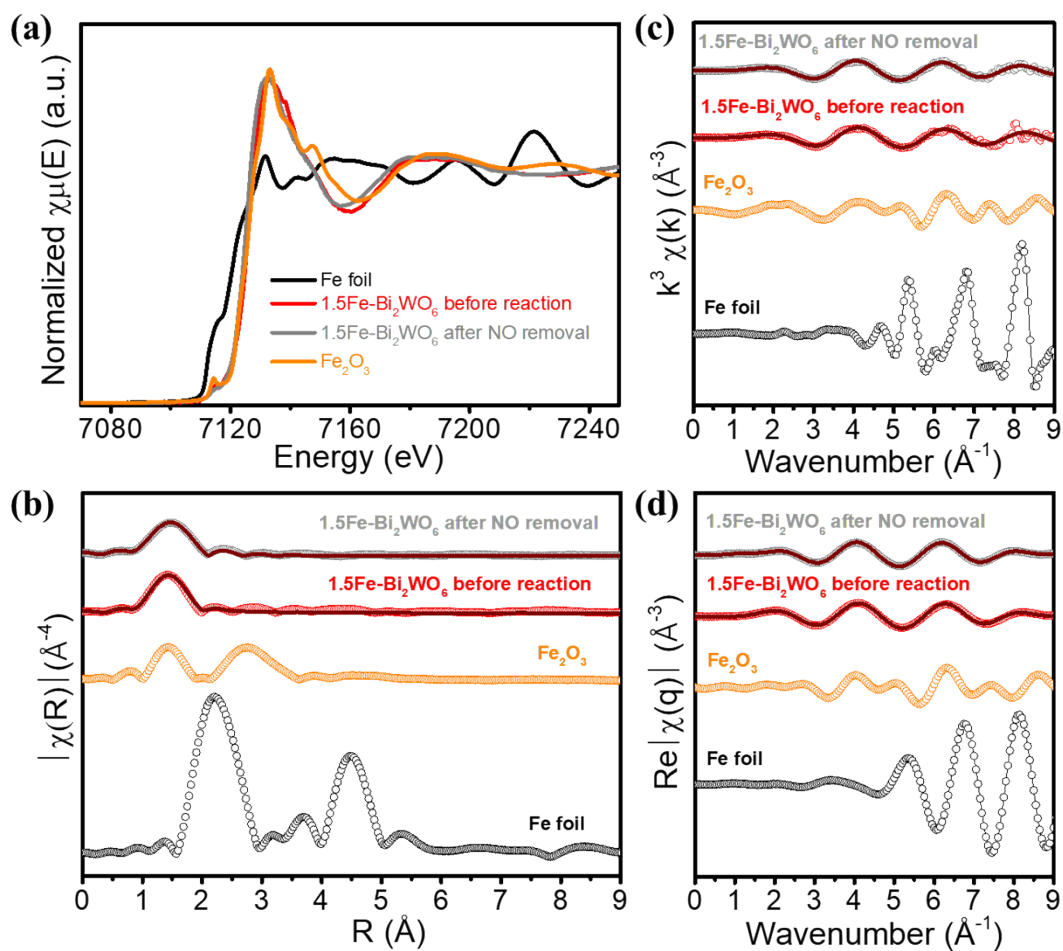

**Figure S14.** (a) Fe K-edge XANES, (b-d) FT-EXAFS spectra and corresponding fitting curves of Fe foil,  $\text{Fe}_2\text{O}_3$ , and  $1.5\text{Fe-Bi}_2\text{WO}_6$  before and after stability test for photocatalytic NO removal.

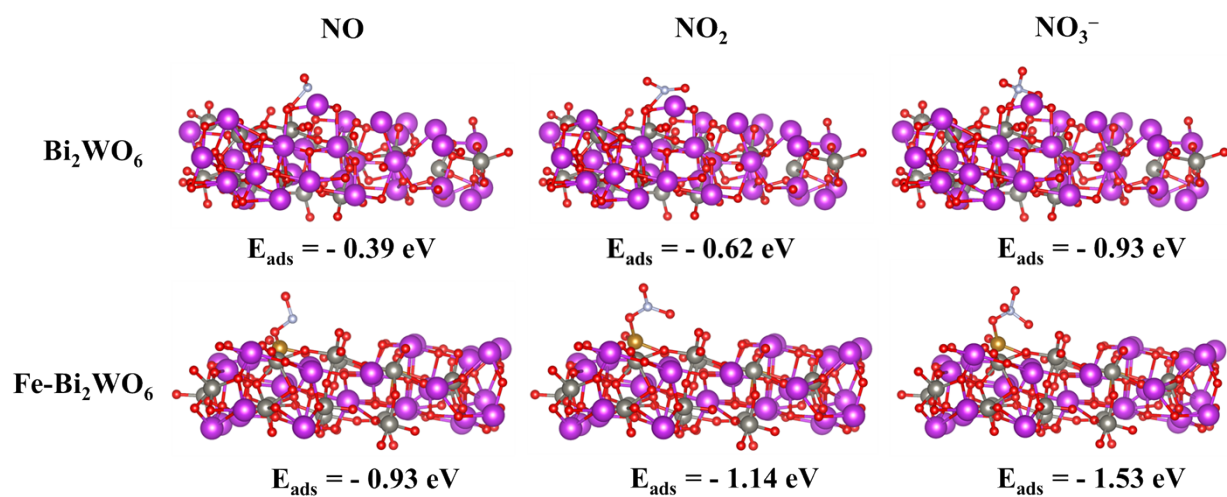

**Figure S15.** The adsorption energy of NO, NO<sub>2</sub>, and NO<sub>3</sub><sup>-</sup> during photocatalytic NO removal on Bi<sub>2</sub>WO<sub>6</sub> and Fe-Bi<sub>2</sub>WO<sub>6</sub> (131).



**Table S1.** The Fe content of Fe-Bi<sub>2</sub>WO<sub>6</sub> samples was measured by ICP-OES.

| Samples          | 1Fe-Bi <sub>2</sub> WO <sub>6</sub> | 1.5Fe-Bi <sub>2</sub> WO <sub>6</sub> | 2Fe-Bi <sub>2</sub> WO <sub>6</sub> |
|------------------|-------------------------------------|---------------------------------------|-------------------------------------|
| Fe amount (wt.%) | 0.06                                | 0.11                                  | 0.18                                |

**Table S2.** Computed average bond lengths (d) of pristine  $\text{Bi}_2\text{WO}_6$  and  $\text{Fe-Bi}_2\text{WO}_6$

|                                               | <b>d (Å)</b> |                    |
|-----------------------------------------------|--------------|--------------------|
|                                               | <b>Bi-O</b>  | <b>W-O ( Fe-O)</b> |
| <b><math>\text{Bi}_2\text{WO}_6</math></b>    | 2.295        | 1.864              |
| <b><math>\text{Fe-Bi}_2\text{WO}_6</math></b> | 2.268        | 1.872 (1.898)      |

**Table S3.** BET surface area, pore volume, and pore diameter of  $\text{Bi}_2\text{WO}_6$  and  $x\text{Fe-Bi}_2\text{WO}_6$  ( $x=1, 1.5, 2$ ).

| <b>Catalysts</b>                                 | <b>BET surface area<br/>(<math>\text{m}^2 \text{g}^{-1}</math>)</b> | <b>Pore volume<br/>(<math>\text{cm}^3 \text{g}^{-1}</math>)</b> | <b>Pore diameter<br/>(nm)</b> |
|--------------------------------------------------|---------------------------------------------------------------------|-----------------------------------------------------------------|-------------------------------|
| <b><math>\text{Bi}_2\text{WO}_6</math></b>       | 70.37                                                               | 0.32                                                            | 8.13                          |
| <b><math>1\text{Fe-Bi}_2\text{WO}_6</math></b>   | 104.93                                                              | 0.40                                                            | 5.08                          |
| <b><math>1.5\text{Fe-Bi}_2\text{WO}_6</math></b> | 106.33                                                              | 0.41                                                            | 6.82                          |
| <b><math>2\text{Fe-Bi}_2\text{WO}_6</math></b>   | 105.68                                                              | 0.42                                                            | 4.46                          |

**Table S4.** Structural parameters of  $x\text{Fe-Bi}_2\text{WO}_6$  ( $x=1, 1.5, 2$ ) catalysts obtained from the EXAFS fitting.

|                                           | Scattering pair | CN   | R( $\text{\AA}$ ) | $\sigma^2$ | $\Delta E_0$<br>(eV) | R-factor |
|-------------------------------------------|-----------------|------|-------------------|------------|----------------------|----------|
| <b>1Fe-Bi<sub>2</sub>WO<sub>6</sub></b>   | Fe-O            | 4.06 | 2.01              | 0.0083     | -1.58                | 0.0035   |
| <b>1.5Fe-Bi<sub>2</sub>WO<sub>6</sub></b> | Fe-O            | 4.11 | 1.99              | 0.0076     | -3.27                | 0.0061   |
| <b>2Fe-Bi<sub>2</sub>WO<sub>6</sub></b>   | Fe-O            | 4.18 | 1.99              | 0.0073     | -3.34                | 0.0057   |

CN: coordination number; R: distance between the absorber and surrounding coordination atoms;  $\sigma^2$ : Debye-Waller factor to describe the variance due to the thermal and lattice disorder;  $\Delta E_0$ : threshold energy correction; R-factor is used to assess the quality of fitting and the smaller value of R-factor the better fitting.

**Table S5.** Band levels (vs. vacuum level) were acquired from UPS and UV-Vis DRS results.

|                      | <b>Bi<sub>2</sub>WO<sub>6</sub></b> | <b>1Fe-Bi<sub>2</sub>WO<sub>6</sub></b> | <b>1.5Fe-Bi<sub>2</sub>WO<sub>6</sub></b> | <b>2Fe-Bi<sub>2</sub>WO<sub>6</sub></b> |
|----------------------|-------------------------------------|-----------------------------------------|-------------------------------------------|-----------------------------------------|
| <b>Work function</b> | 3.72                                | 3.56                                    | 3.52                                      | 3.63                                    |
| <b>VBM</b>           | 6.02                                | 6.15                                    | 6.17                                      | 6.24                                    |
| <b>Band gap</b>      | 2.88                                | 2.77                                    | 2.74                                      | 2.69                                    |
| <b>CBM</b>           | 3.14                                | 3.38                                    | 3.43                                      | 3.55                                    |

\* UPS spectra recorded with an incident photon energy of 21.2 eV.

**Table S6.** TRPL fitting parameters for Bi<sub>2</sub>WO<sub>6</sub> and xFe-Bi<sub>2</sub>WO<sub>6</sub> (x=1, 1.5, 2) samples, respectively.

| Sample                                | $\tau_1$ (ns) | A <sub>1</sub> (%) | $\tau_2$ (ns) | A <sub>2</sub> (%) | $\tau_{ave}$ (ns) |
|---------------------------------------|---------------|--------------------|---------------|--------------------|-------------------|
| Bi <sub>2</sub> WO <sub>6</sub>       | 0.27          | 24.25              | 1.53          | 75.75              | 1.46              |
| 1Fe-Bi <sub>2</sub> WO <sub>6</sub>   | 0.22          | 26.16              | 1.19          | 73.84              | 1.13              |
| 1.5Fe-Bi <sub>2</sub> WO <sub>6</sub> | 0.21          | 22.79              | 1.12          | 77.21              | 1.07              |
| 2Fe-Bi <sub>2</sub> WO <sub>6</sub>   | 0.26          | 25.77              | 1.31          | 74.23              | 1.24              |

TRPL curves were fitted by bi-exponential decay function and the average lifetimes were calculated by the following **equation S1**:

$$\tau_{ave} = \frac{A_1 \cdot \tau_1^2 + A_2 \cdot \tau_2^2}{A_1 \cdot \tau_1 + A_2 \cdot \tau_2} \quad (\text{S1})$$

**Table S7.** Structural parameters of 1.5Fe-Bi<sub>2</sub>WO<sub>6</sub> before and after photocatalytic CO<sub>2</sub> reduction stability test acquired from the EXAFS fitting.

|                                                                                         | Scattering pair | CN   | R(Å) | σ <sup>2</sup> | ΔE <sub>0</sub> (eV) | R-factor |
|-----------------------------------------------------------------------------------------|-----------------|------|------|----------------|----------------------|----------|
| <b>1.5Fe-Bi<sub>2</sub>WO<sub>6</sub> before reaction</b>                               | Fe-O            | 4.11 | 1.99 | 0.0076         | -3.27                | 0.0061   |
| <b>1.5Fe-Bi<sub>2</sub>WO<sub>6</sub> after CO<sub>2</sub> reduction stability test</b> | Fe-O            | 4.20 | 1.99 | 0.0072         | -1.63                | 0.0024   |

**Table S8.** Comparison of the photocatalytic CO<sub>2</sub> reduction yield of previously reported studies and our catalyst.

| Materials                                                                                        | Reaction conditions                                                                                              | Products           | Yield of CO <sub>2</sub> reduction<br>( $\mu\text{mol}\cdot\text{g}^{-1}\cdot\text{h}^{-1}$ ) | Ref.              |
|--------------------------------------------------------------------------------------------------|------------------------------------------------------------------------------------------------------------------|--------------------|-----------------------------------------------------------------------------------------------|-------------------|
| Bi <sub>2</sub> WO <sub>6</sub> /TiO <sub>2</sub> heterostructures                               | <ul style="list-style-type: none"><li>Flow type</li><li>UV illumination</li></ul>                                | CH <sub>4</sub>    | 1.06                                                                                          | 1                 |
| Atomically thin Bi <sub>2</sub> WO <sub>6</sub> nanosheets with hydrophobic and nonpolar surface | <ul style="list-style-type: none"><li>Flow type</li></ul>                                                        | CO                 | 7.12                                                                                          | 2                 |
|                                                                                                  | <ul style="list-style-type: none"><li>A 300 W Xe lamp</li></ul>                                                  | CH <sub>4</sub>    | 0.63                                                                                          |                   |
| Chloride Modified Bi <sub>2</sub> WO <sub>6</sub> Nanosheets                                     | <ul style="list-style-type: none"><li>Flow type</li></ul>                                                        | CO                 | 1.66                                                                                          | 3                 |
|                                                                                                  | <ul style="list-style-type: none"><li>300 W Xenon lamp</li></ul>                                                 | CH <sub>4</sub>    | 0.35                                                                                          |                   |
| 2D/2D Bi <sub>2</sub> WO <sub>6</sub> /BiOI heterojunctions                                      | <ul style="list-style-type: none"><li>Flow type</li><li>500 W Xenon arc lamp with an UV cut-off filter</li></ul> | CH <sub>4</sub>    | 2.29                                                                                          | 4                 |
| 2D/2D MXene/Bi <sub>2</sub> WO <sub>6</sub>                                                      | <ul style="list-style-type: none"><li>Batch type</li></ul>                                                       | CH <sub>4</sub>    | 1.78                                                                                          | 5                 |
|                                                                                                  | <ul style="list-style-type: none"><li>A Xe lamp</li></ul>                                                        | CH <sub>3</sub> OH | 0.44                                                                                          |                   |
| Atomically dispersed Fe-Bi <sub>2</sub> WO <sub>6</sub>                                          | <ul style="list-style-type: none"><li>Batch type</li></ul>                                                       | CO                 | 9.20                                                                                          | <b>This study</b> |



**Table S9.** Structural parameters of 1.5Fe-Bi<sub>2</sub>WO<sub>6</sub> before and after photocatalytic NO removal stability test acquired from the EXAFS fitting.

|                                                                           | Scattering pair | CN   | R(Å) | $\sigma^2$ | $\Delta E_0$ (eV) | R-factor |
|---------------------------------------------------------------------------|-----------------|------|------|------------|-------------------|----------|
| <b>1.5Fe-Bi<sub>2</sub>WO<sub>6</sub> before reaction</b>                 | Fe-O            | 4.11 | 1.99 | 0.0076     | -3.27             | 0.0061   |
| <b>1.5Fe-Bi<sub>2</sub>WO<sub>6</sub> after NO removal stability test</b> | Fe-O            | 4.18 | 1.99 | 0.0073     | -3.34             | 0.0057   |

**Table S10.** Comparison of the photocatalytic NO removal efficiency, the selectivity of the NO<sub>3</sub><sup>-</sup> product of previously reported studies and our catalyst.

| Materials                                                                            | Catalyst's dosage | NO conc. (ppb) | Light source  | NO removal efficiency (%) | NO <sub>2</sub> conversion efficiency (%)/(ppb) | NO <sub>3</sub> <sup>-</sup> selectivity (%) | NO removal stability (%)    | Ref.              |
|--------------------------------------------------------------------------------------|-------------------|----------------|---------------|---------------------------|-------------------------------------------------|----------------------------------------------|-----------------------------|-------------------|
| Oxygen vacancies modified Bi <sub>2</sub> WO <sub>6</sub>                            | 0.2               | 550            | Visible light | 47                        | -                                               | -                                            | Loss of 10% after 5 cycles  | 6                 |
| Bi <sub>12</sub> GeO <sub>20</sub> -Bi <sub>2</sub> S <sub>3</sub>                   | 0.4               | 580            | Visible light | 46                        | > 5 ppb                                         | 96                                           | -                           | 7                 |
| Ternary Bi/Bi <sub>2</sub> O <sub>3</sub> /Bi <sub>2</sub> WO <sub>6</sub> composite | 0.2               | 550            | Visible light | 55.4                      | -                                               | -                                            | -                           | 8                 |
| Carbonate-intercalated defective Bi <sub>2</sub> WO <sub>6</sub>                     | 0.2               | 550            | Visible light | 55                        | -                                               | -                                            | Loss of ~13% after 5 cycles | 9                 |
| Fe(iii) cluster-grafted (BiO) <sub>2</sub> CO <sub>3</sub>                           | 0.1               | 550            | Visible light | 44.1                      | -                                               | -                                            | -                           | 10                |
| Bi <sub>2</sub> WO <sub>6</sub> /BiOI heterostructure                                | 0.2               | 500            | Visible light | 40                        | -                                               | -                                            | -                           | 11                |
| Atomically dispersed Fe-Bi <sub>2</sub> WO <sub>6</sub>                              | 0.2               | 500            | Visible light | 50.4                      | 0.37%/<br/>< 2 ppb                              | 99.6                                         | Loss of 4.3% after 5 cycles | <b>This study</b> |

(-) means did not mentioned or state the specific numbers.

## Reference

1. L. Collado, M. Gomez-Mendoza, M. García-Tecedor, F. E. Oropeza, A. Reynal, J. R. Durrant, D. P. Serrano and V. A. de la Peña O'Shea, *Applied Catalysis B: Environmental*, 2023, **324**, 122206.
2. Y. Liu, D. Shen, Q. Zhang, Y. Lin and F. Peng, *Applied Catalysis B: Environmental*, 2021, **283**, 119630.
3. Y. Y. Li, J. S. Fan, R. Q. Tan, H. C. Yao, Y. Peng, Q. C. Liu and Z. J. Li, *ACS Appl Mater Interfaces*, 2020, **12**, 54507-54516.
4. X. Y. Kong, W. Q. Lee, A. R. Mohamed and S.-P. Chai, *Chemical Engineering Journal*, 2019, **372**, 1183-1193.
5. S. Cao, B. Shen, T. Tong, J. Fu and J. Yu, *Advanced Functional Materials*, 2018, **28**, 1800136.
6. W. C. Huo, X. a. Dong, J. Y. Li, M. Liu, X. Y. Liu, Y. X. Zhang and F. Dong, *Chemical Engineering Journal*, 2019, **361**, 129-138.
7. F. Chang, X. Wang, C. Yang, S. Li, J. Wang, W. Yang, F. Dong, X. Hu, D.-g. Liu and Y. Kong, *Composites Part B: Engineering*, 2022, **231**, 109600.
8. W. He, Y. Sun, G. Jiang, H. Huang, X. Zhang and F. Dong, *Applied Catalysis B: Environmental*, 2018, **232**, 340-347.
9. W. Huo, W. Xu, T. Cao, X. Liu, Y. Zhang and F. Dong, *Applied Catalysis B: Environmental*, 2019, **254**, 206-213.
10. X. Feng, W. Zhang, Y. Sun, H. Huang and F. Dong, *Environmental Science: Nano*, 2017, **4**, 604-612.

11. L. Wang, K. Xu, W. Cui, D. Lv, L. Wang, L. Ren, X. Xu, F. Dong, S. X. Dou, W. Hao and Y. Du, *Advanced Functional Materials*, 2019, **29**, 1808084.
